# Supplementary material for: Rational design of an Fe cluster catalyst for robust nitrogen activation
Source: Royal Society of Chemistry journal article supplement (doi:10.1039/d1ta04638a), 2021-01-01
Supplement: d1ta04638a1.pdf [file d1ta04638a1.pdf]

## Supporting Information

### **Rational design of Fe cluster catalyst for robust nitrogen activation**

Tianyi Dai, Xingyou Lang,<sup>\*</sup> Zhili Wang, Zi Wen<sup>\*</sup> and Qing Jiang<sup>\*</sup>

*Key Laboratory of Automobile Materials, Ministry of Education, and School of  
Materials Science and Engineering, Jilin University, Changchun 130022, China*

---

<sup>\*</sup>Correspondence and requests for materials should be addressed to X. Y. L. (e-mail: xylang@jlu.edu.cn), Z. W. (e-mail: weizi@jlu.edu.cn) and Q. J. (e-mail: jiangq@jlu.edu.cn).

## Supporting Note 1: The spin of Fe atom

According to the number of unpaired electrons in the d band of Fe, the initial spins of Fe atom were set from 0 to 4, respectively. As results, all the systems were convergence to the same spin of Fe<sub>4</sub> at 10.25  $\mu_B$  with the same energy. Therefore, an initial spin of 3 was set to each Fe atom in this work.

Then, different spin configurations are considered, including ferromagnetic state (FS), antiferromagnetic state (AS), and nonmagnetic state (NS). As results, the FS is the most stable spin configuration, whose energy is 2.51 eV lower than NS, and the AS is transformed to FS after geometry optimization. Therefore, only FS configuration is considered in this work.

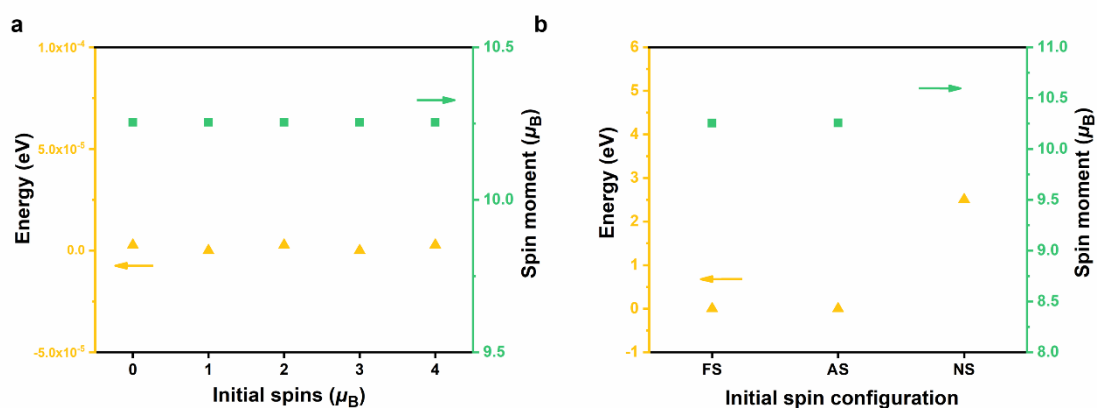

**Fig. S1** (a) The corresponding energies (in eV) and spin moments (in  $\mu_B$ ) after geometry optimization with initial spins set from 0 to 4. (b) The energy (in eV) and spin moments (in  $\mu_B$ ) of different spin configurations.

## Supporting Note 2: The calculation of threshold potential $U_n$

The threshold potential  $U_n$  for leaching one metal atom from  $\text{Fe}_n/\text{GaS}$  is determined by the methods proposed in reference 82 in the text part.

The leaching process is investigated with differential leaching steps for a  $\text{Fe}_n$  cluster anchored on the substrate

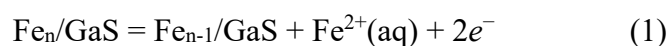

Thus, the corresponding reaction energies at a certain applied potential  $U$  can be written as

$$\Delta E(\text{Fe}_n - \text{Fe}_{n-1}) = E(\text{Fe}_{n-1}/\text{GaS}) + E(\text{Fe}^{2+}(\text{aq})) - E(\text{Fe}_n/\text{GaS}) + 2eU \quad (2)$$

However, the linear coefficient for  $U$  dependence and  $E(\text{Fe}_n/\text{GaS})$  is neglect since the limit potential ( $U_L$ ) in this work is low. The free energies of solvated cations  $E(\text{Fe}^{2+}(\text{aq}))$  from the experimental standard reduction potentials  $U_0$  and the calculated free energies of bulk metals  $E(\text{Fe}(\text{s}))$  is calculated by

$$E(\text{Fe}^{2+}(\text{aq})) = E(\text{Fe}(\text{s})) - 2eU_0 \quad (3)$$

The  $U_0$ 's of Fe element is from CRC *handbook of chemistry and physic* at  $-0.447$  V.

Combining eqs 2 and 3, one derives

$$\begin{aligned} \Delta E(\text{Fe}_n - \text{Fe}_{n-1}) &= 2eU + E(\text{Fe}_{n-1}/\text{GaS}) - E(\text{Fe}_n/\text{GaS}) \\ &+ E(\text{Fe}(\text{s})) - 2eU_0 \end{aligned} \quad (4)$$

When  $\Delta E(\text{Fe}_n - \text{Fe}_{n-1}) < 0$ , the leaching step is taking place spontaneously. Thus, the threshold potential  $U_n$  for leaching one metal atom from  $\text{Fe}_n/\text{GaS}$  is

$$U_n = (E(\text{Fe}_{n-1}/\text{GaS}) + 2eU_0 - E(\text{Fe}_n/\text{GaS}) - E(\text{Fe}(\text{s}))) / 2e \quad (5)$$

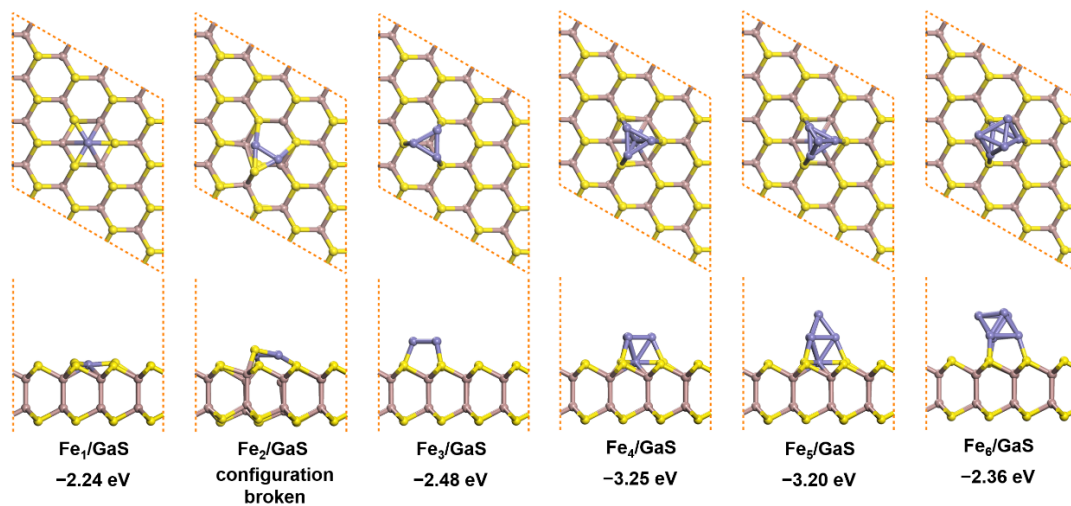

**Fig. S2** Optimized structure of  $\text{Fe}_n/\text{GaS}$  ( $n = 1 \sim 6$ ) with the corresponding binding energies.

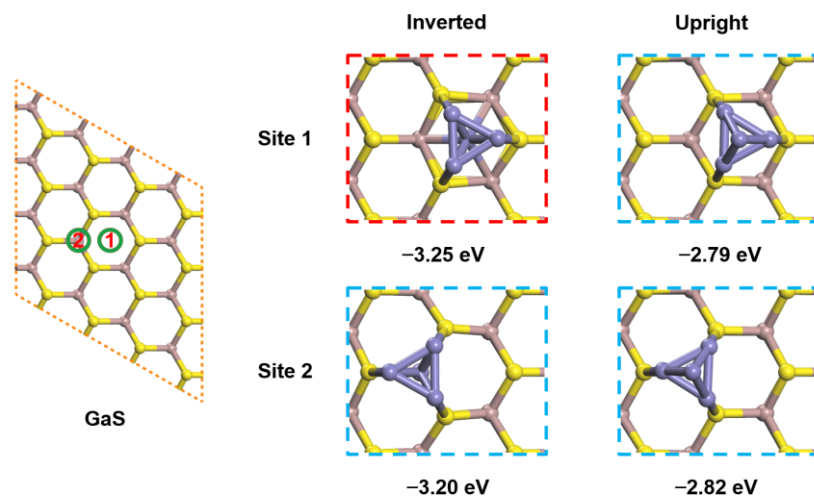

**Fig. S3** Different binding configurations of Fe<sub>4</sub> cluster on GaS and the corresponding binding energy values.

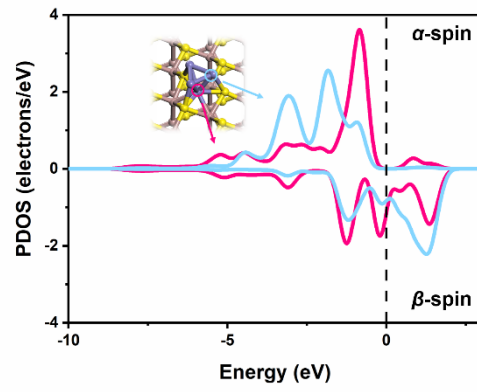

**Fig. S4** Partial density of states (PDOS) of Fe atoms in Fe<sub>4</sub>/GaS with two type electron structures. The Fermi level is set to zero.

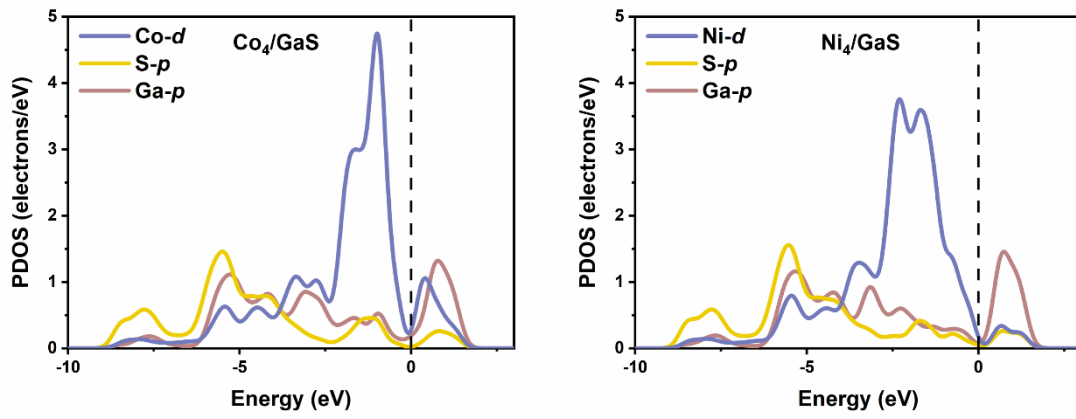

**Fig. S5** PDOS of Co<sub>4</sub>/GaS and Ni<sub>4</sub>/GaS, including the Co/Ni-*d* orbits and adjacent S-*p*, Ga-*p* orbits. The Fermi level is set to zero.

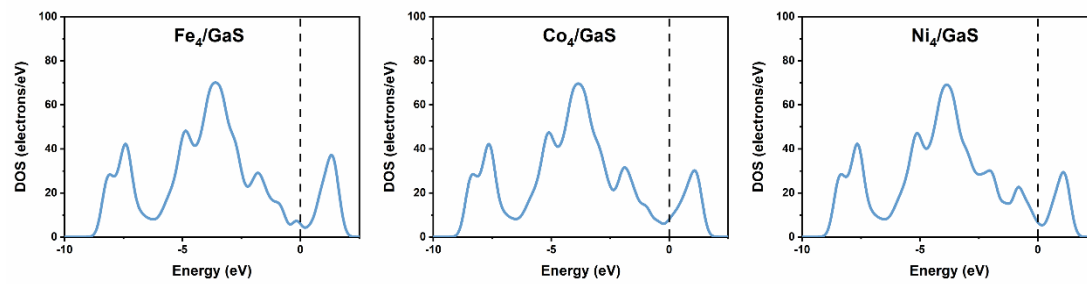

**Fig. S6** Density of states (DOS) of M<sub>4</sub>/GaS (M = Fe, Co, Ni). The black dotted line indicates the Fermi energy level.



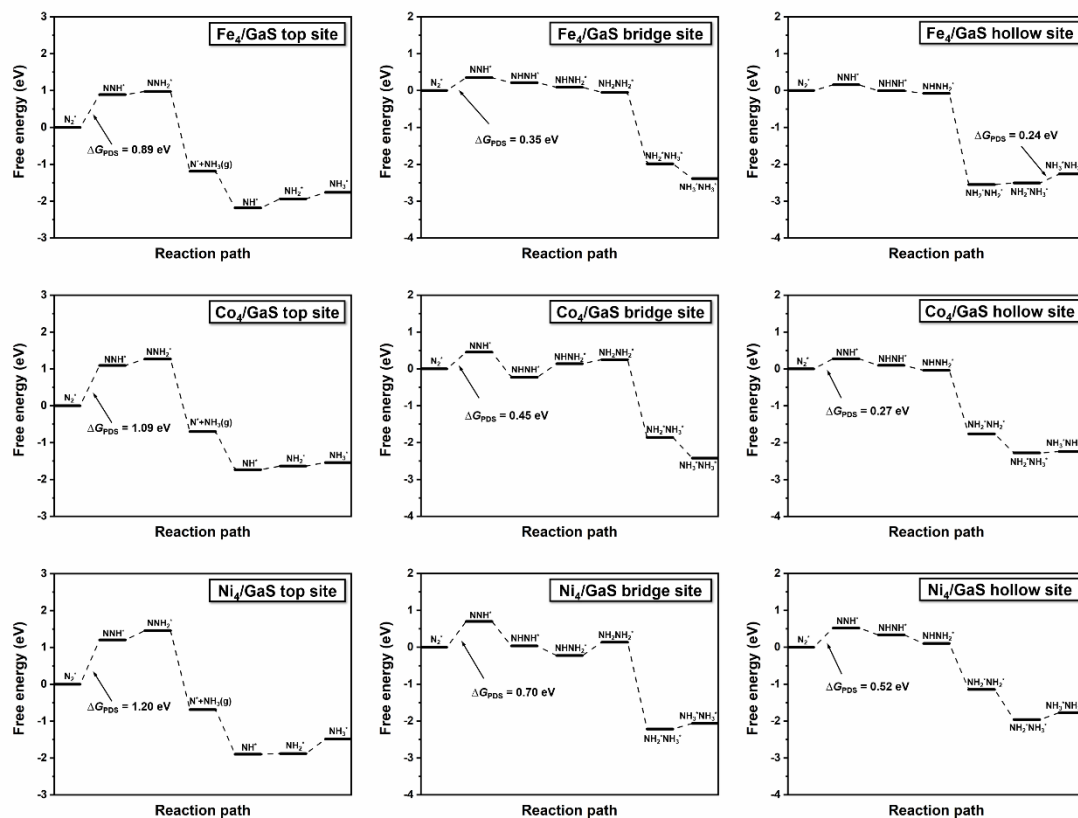

**Fig. S7** The reaction path for NRR on  $M_4/\text{GaS}$  ( $M = \text{Fe}, \text{Co}, \text{Ni}$ ). The free energy profiles and the potential determining step (PDS) are shown.

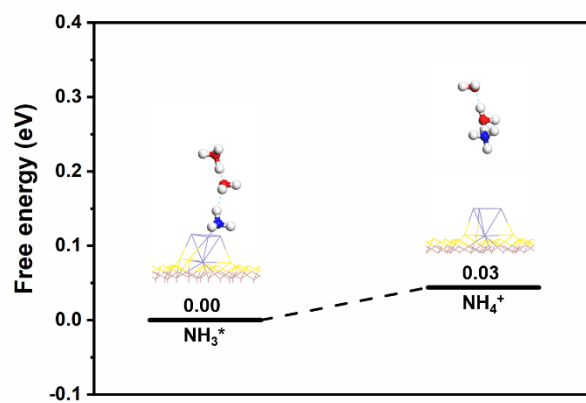

**Fig. S8** Desorption process of  $\text{NH}_3^*$  to  $\text{NH}_4^+$  on  $\text{Fe}_4/\text{GaS}$  with the free energy profile. The proton comes from  $\text{H}_5\text{O}_2^+$ . The solvation model is used with a dielectric constant of 78.54.

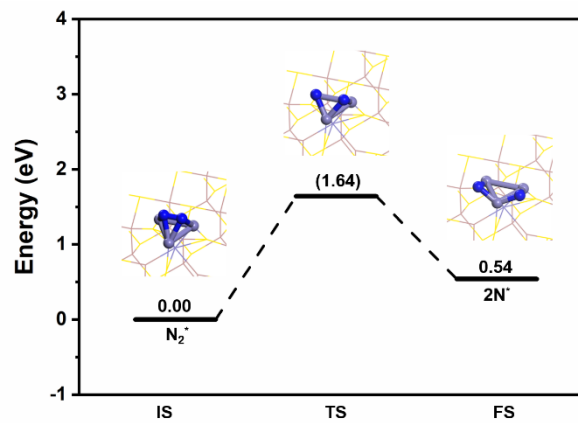

**Fig. S9** Energy profile of the dissociation of adsorbed  $N_2$  into two separate N atoms on the hollow site of  $Fe_4/GaS$ .

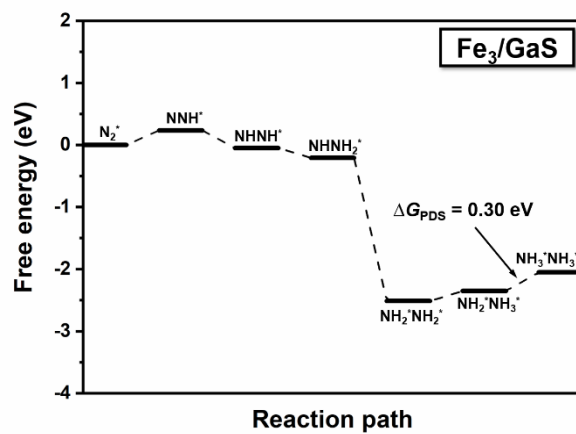

**Fig. S10** The reaction path for NRR on Fe<sub>3</sub>/GaS. The free energy profiles and the potential determining step (PDS) are shown.

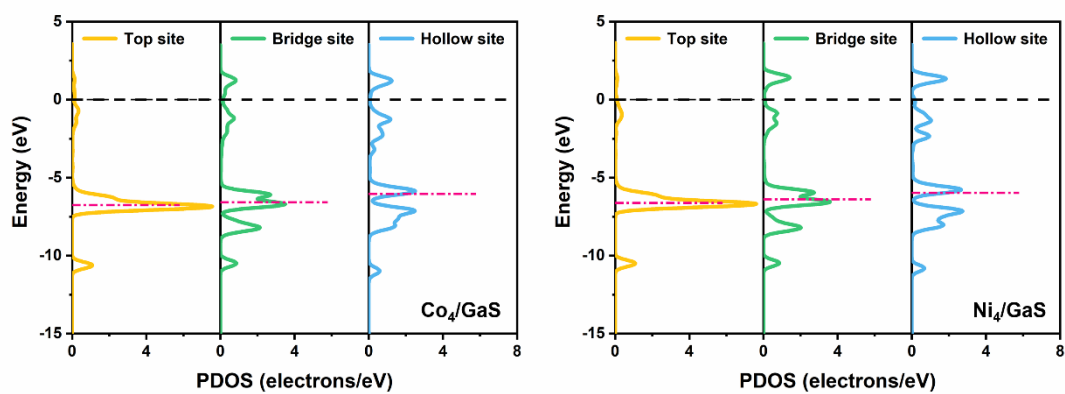

**Fig. S11** PDOS of N<sub>2</sub> adsorbed on different sites of Co<sub>4</sub>/GaS and Ni<sub>4</sub>/GaS with N-*p* orbitals. The Fermi level is set to zero.

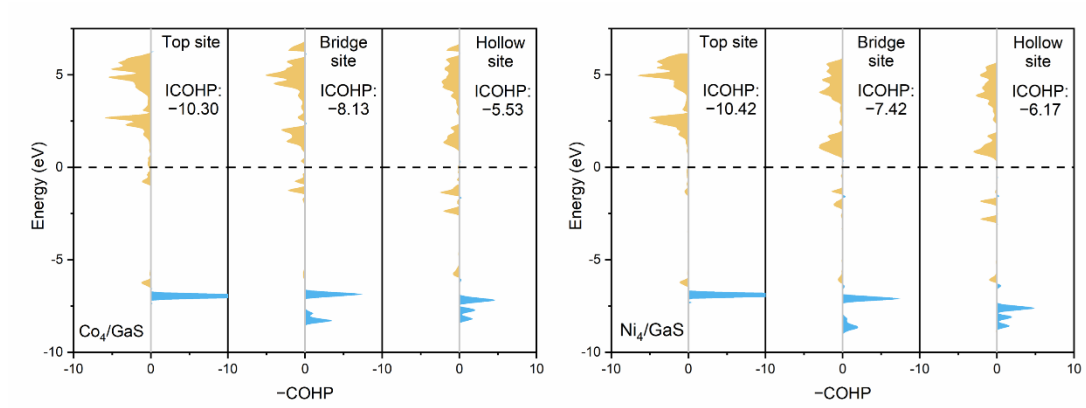

**Fig. S12** Crystal orbital Hamilton population (COHP) between N–N bond on Co<sub>4</sub>/GaS and Ni<sub>4</sub>/GaS with the integrated crystal orbital Hamilton population (ICOHP).

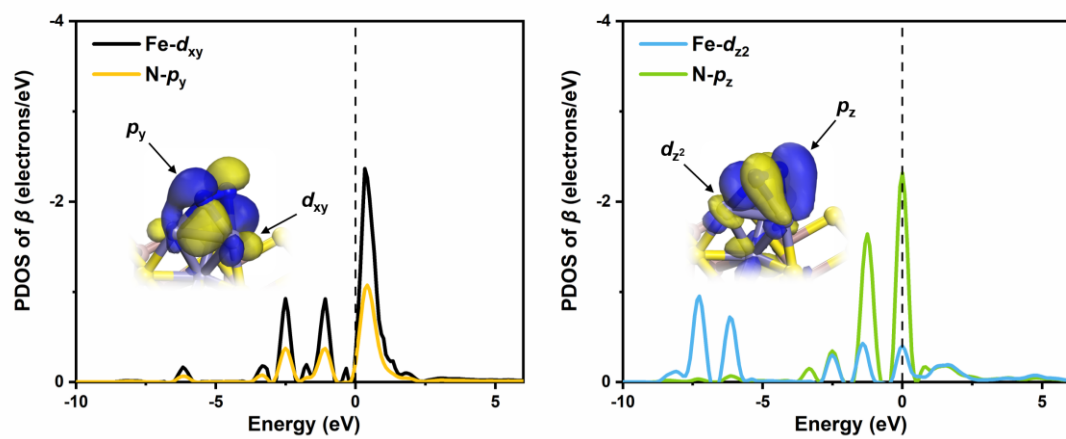

**Fig. S13** PDOS of  $\beta$ -spin Fe- $d_{xy}$  and N $_2$ - $p_y$  orbitals, and  $\beta$ -spin Fe- $d_{z^2}$  and N $_2$ - $p_z$  orbitals. The inserts are the illustration of the orbital hybridization.

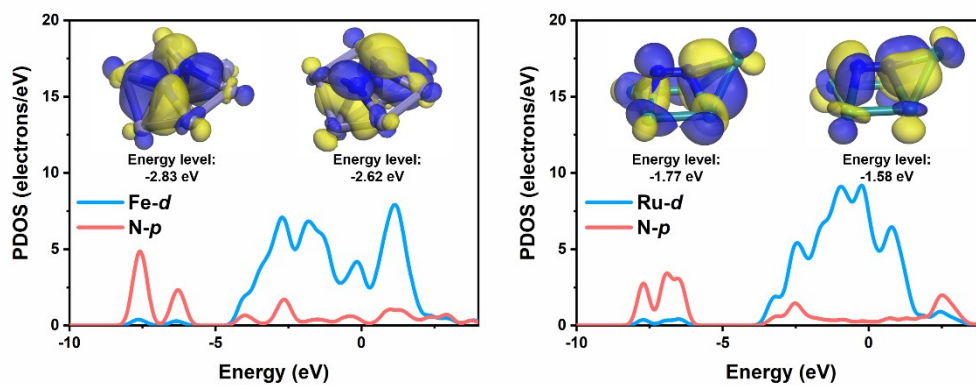

**Fig. S14** The PDOS of  $N_2$  adsorbed on the C7 site of Fe(211) and B5 site of Ru(0001). The inserts are illustration of the orbital hybridization between the  $N_2-\pi^*$  orbitals and the frontier orbitals of the active sites.



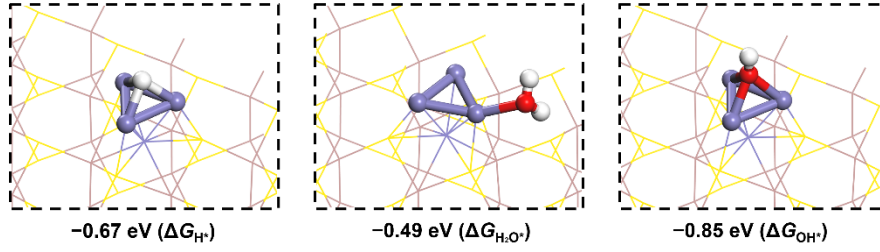

**Fig. S15** The adsorption configuration of  $\text{H}^*$ ,  $\text{H}_2\text{O}^*$  and  $\text{OH}^*$  on the  $\text{Fe}_4/\text{GaS}$  with the adsorption free energy values.

Calculation details are listed below:

DFT adsorption free energies:

$$\Delta G_{\text{ad}} = \Delta E_{\text{ad}} + \Delta ZPE - T\Delta S$$

DFT adsorption energies are calculated as:

$$\Delta E_{\text{H}^*} = E_{\text{H}^*} - E^* - 0.5E_{\text{H}_2(\text{g})}$$

$$\Delta E_{\text{H}_2\text{O}^*} = E_{\text{H}_2\text{O}^*} - E^* - E_{\text{H}_2\text{O}(\text{g})}$$

$$\Delta E_{\text{OH}^*} = E_{\text{OH}^*} - E^* - [E_{\text{H}_2\text{O}(\text{g})} - 0.5E_{\text{H}_2(\text{g})}]$$

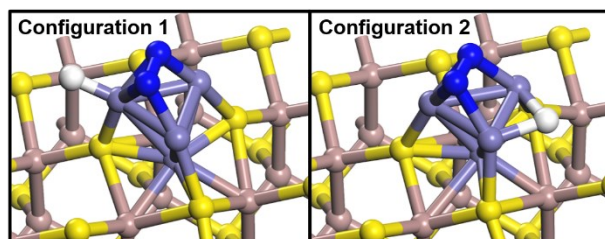

**Fig. S16** The co-adsorption configurations of  $H^*$  and  $N_2^*$  on the  $Fe_4/GaS$ .

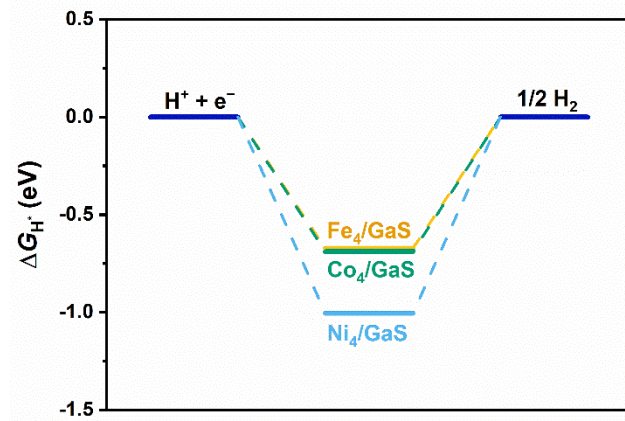

**Fig. S17** Gibbs free energy diagram for HER process of  $Fe_4/GaS$ ,  $Co_4/GaS$  and  $Ni_4/GaS$ .

**Table S1** Calculated potentials ( $U$ ) for NRR on different systems

| Catalysts                                            | $U(\text{V})$ vs. RHE | References |
|------------------------------------------------------|-----------------------|------------|
| Fe <sub>4</sub> /GaS                                 | -0.24                 | This work  |
| Fe <sub>3</sub> -GDY/Gra                             | -0.37                 | 33         |
| Mo-embedded BN                                       | -0.35                 | 64         |
| Mo <sub>1</sub> (Cr <sub>1</sub> )/N <sub>3</sub> -G | -0.50 (-0.75)         | 65         |
| MoS <sub>2</sub>                                     | -0.68                 | 66         |
| B-graphene                                           | -0.31                 | 67         |
| B <sub>4</sub> C(110)                                | -0.34                 | 68         |
| Au(310)                                              | -1.50                 | 69         |
| Several MXene materials                              | > -0.63               | 70         |
| Several SACs                                         | > -0.33               | 71         |
| Several metal surfaces                               | > -0.70               | 72         |
